# Supplementary material for: circ2CBA: prediction of circRNA-RBP binding sites combining deep learning and attention mechanism
Source: Springer Nature journal article supplement (doi:10.1007/s11704-022-2151-0), 2022-12-13
Supplement: 11704_2022_2151_MOESM1_ESM.pdf [file 11704_2022_2151_MOESM1_ESM.pdf]

# circ2CBA: Prediction of circRNA-RBP binding sites combining deep learning and attention mechanism

**Yajing GUO, Xiujuan LEI, Lian LIU and Yi PAN**

Frontiers of Computer Science, DOI: [10.1007/s11704-022-2151-0](https://doi.org/10.1007/s11704-022-2151-0)

# Problems & Ideas

- Problems of conventional binding sites prediction methods:
  - Existing methods can not fully learn and utilize features of circRNA sequences.
  - The performance of existing methods needs to be further improved.
- Ideas: A joint model that considering the context information between sequence nucleotides and the important position weight information of features.

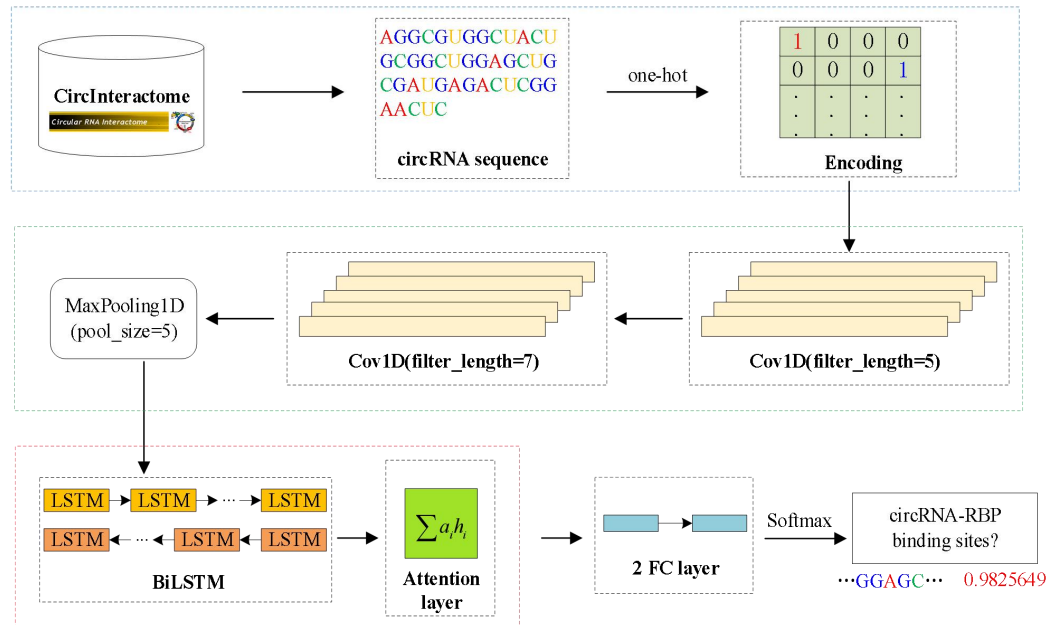

Flowchart of our model. Top: The top part indicates the input data of circ2CBA and the encoding process; Middle: The middle part is to extract latent features from circRNA sequences; Bottom: the bottom part is to learn context information using BiLSTM and to distribute the weight of features using Attention Layer.

# Main Contributions

- Contributions:
  - A two-layer CNN that can not only extract features of circRNA sequences but also get a larger perception domain;
  - A novel joint model that can not only learn the context information from the extracted features but also distribute the weights for the features;
  - A motif analysis to explore the reason for the remarkable performance improvement of our method on some sub-datasets.

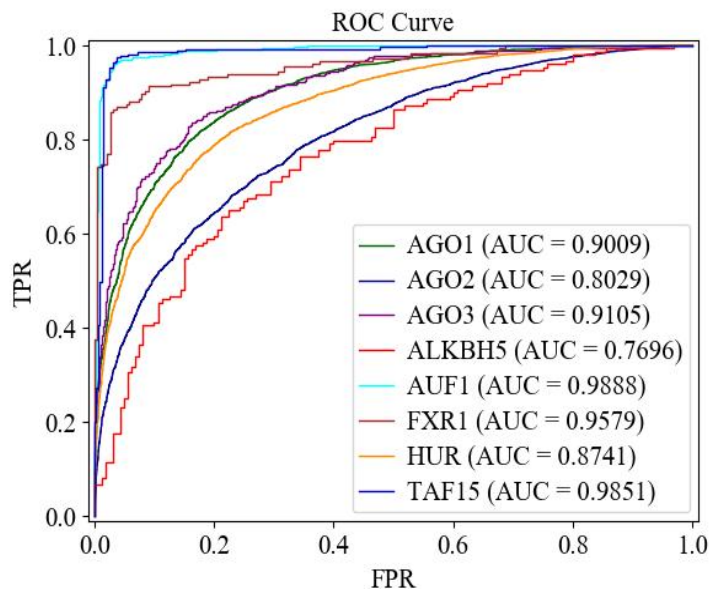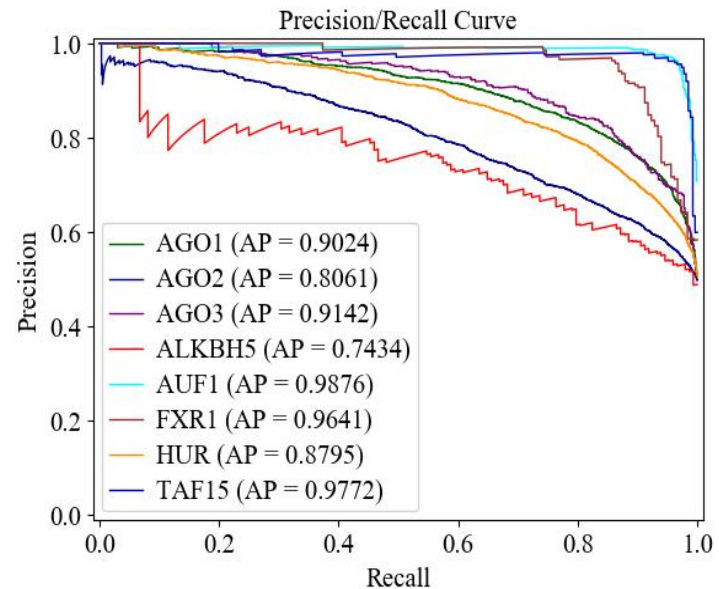

The experiment results of circ2CBA on eight sub-datasets. Left: the ROC curve of circ2CBA; Right: the Precision/Recall curve of circ2CBA.
